# Supplementary material for: Global impact of the COVID-19 pandemic on subarachnoid haemorrhage hospitalisations, aneurysm treatment and in-hospital mortality: 1-year follow-up
Source: HighWire-hosted journal article supplement (doi:10.1136/jnnp-2022-329200), 2022-07-28
Supplement: jnnp-2022-329200supp001_data_supplement.pdf [file jnnp-2022-329200supp001_data_supplement.pdf]

## Supplementary Information

|                                                                                                                   |    |
|-------------------------------------------------------------------------------------------------------------------|----|
| <b>Complete List of Authors</b>                                                                                   | 2  |
| <b>Table S1.</b> Nontraumatic SAH admissions overall and monthly volumes before and during the COVID-19 pandemic. | 15 |

## **Complete List of Authors**

Thanh N. Nguyen, MD (Neurology, Radiology, Boston Medical Center, Boston, USA), Muhammad M. Qureshi, MBBS (Radiology, Radiation Oncology, Boston Medical Center, Boston, USA), Piers Klein (Boston Medical Center, Boston, USA), Robert Mikulik, MD, PhD (Department of Neurology, International Clinical Research Centre, St Anne's University Hospital and Faculty of Medicine, Masaryk University, Brno, Czech Republic) Hiroshi Yamagami, MD, PhD, Mohamad Abdalkader, MD, (Radiology, Boston Medical Center, Boston, USA), Ossama Yassin Mansour, MD, PhD (Department of Neurology, Alexandria University Stroke and Neurointervention Unit, Alexandria, Egypt), Anna Czlonkowska, MD, PhD, (2nd Department of Neurology, Institute of Psychiatry and Neurology, Warsaw, Poland), Anvitha Sathya, Jelle Demeestere, MD (Neurology Department, Leuven University Hospital, Leuven, Belgium), Hannah Lo, (Boston Medical Center, Boston, USA), Nobuyuki Sakai, MD (Department of Neurosurgery, Kobe City Medical Center General Hospital), Petra Sedova, MD, PhD (Department of Neurology, International Clinical Research Center, St. Anne's University Hospital and Faculty of Medicine, Masaryk University, Brno, Czech Republic), Espen Saxhaug Kristoffersen, MD, PhD (Department of Neurology, Akershus University Hospital, University of Oslo, Oslo, Norway) Mahmoud Mohammaden, MD (Emory University School of Medicine), Alexander Sirakov, MD (Department of Radiology, University Hospital St Ivan Rilski, Bulgaria)

### **Argentina**

Virginia Pujol Lereis, MD (Division de Neurologia Vasculare, Departamento de Neurologia, Institute for Neurological Research - FLENI, Buenos Aires), Sergio Daniel Scollo, MD (Stroke Unit Ramos Mejia Hospital, Buenos Aires)

### **Australia**

Alice Ma, MBBS (Royal North Shore Hospital, Sydney)

### **Bangladesh**

Aminur Rahman, MD, FCPS (Department of Neurology, Sir Salimullah Medical College, Mitford, Dhaka, Bangladesh)

### **Belgium**

Thomas Bonnet, MD (Hopital Erasme, Brussels, Belgium), Jeroen Cortier, MD (Department of Neurosurgery, Universitair Ziekenhuis Brussel, Center for Neurosciences, Vrije Universiteit Brussel, Brussels, Belgium), Sylvie De Raedt, MD PhD (Department of Neurology, Universitair Ziekenhuis Brussel, Center for Neurosciences, Vrije Universiteit Brussel, Brussels, Belgium), Robin Lemmens, MD, PhD (Neurology Department, Leuven University Hospital, Leuven, Belgium) Noémie Ligot, MD (Hopital Erasme, Brussels, Belgium)

### **Brazil**

Raquel C.T. Hidalgo, MD (Hospital de Base de São José do Rio Preto, São Paulo), Daissy Liliana Mora Cuervo, MD (Moinhos de Vento Hospital, Brazil), Luciana de Oliveira Neves, MD (Hospital São Carlos, Brazil), Marco Túlio Salles Rezende, MD, MsC, PhD (Interventional Neuroradiology, Rede Mater Dei de Saúde, Belo Horizonte, Brazil), Igor Bessa Santiago, MD (Hospital São Carlos, Brazil)

### **Bulgaria**

Kristina Sirakova, MD (Radiology, UH Alexandrovska, Sofia, Bulgaria), Stanimir Sirakov, MD (Department of Radiology, University Hospital St Ivan Rilski, Bulgaria)

### **Canada**

Elena Adela Cora, MD, PhD (Department of Diagnostic Radiology, Halifax Infirmary, Dalhousie University), Michael E. Kelly, MD PhD (Royal University Hospital, Saskatoon, Saskatchewan, Canada), Pascale Lavoie, MD (CHU de Québec, Université Laval, Quebec, Canada), Lissa Peeling, MD, (Royal University Hospital, Saskatoon, Saskatchewan, Canada) Aleksandra Pikula, MD (Toronto Western Hospital, University of Toronto, Toronto, Canada)

### **Chile**

Rodrigo Rivera, MD (Neuroradiology Department, Instituto de Neurocirugía Dr. Asenjo, Santiago, Chile)

### **China**

Hui-Sheng Chen, MD, PhD (Department of Neurology, General Hospital of Northern Theater Command, Shen Yang, China), Yimin Chen, MD (Department of Neurology, Foshan Sanshui District People's Hospital, China), Hongliang Fang, MD (Department of Quality Control, Foshan Sanshui District People's Hospital, China)

### **Croatia**

Marina Roje Bedekovic, MD (Sestre Milosrdnice University Hospital Center), Hrvoje Budincevic, MD, PhD (Sveti Duh University Hospital - Zagreb, Department of Neurology, Zagreb, Croatia; J.J. Strossmayer University of Osijek, Faculty of Medicine, Department of Neurology and Neurosurgery, Osijek, Croatia)

### **Czech Republic**

Martin Čabal, MD (Neurology, Faculty Hospital Ostrava)  
Emanuela Hrabanovska, MD, (Uherskohradištská Hospital, Czech Republic)  
Lubomír Jurák, MD PhD (Neurocenter, Regional Hospital Liberec, Czech Republic)  
Jana Kadlcikova, MD (Neurology, Hospital Vyskov, Czech Republic)  
Igor Karpowicz, MD (Regional Hospital Karlovy Vary, Czech Republic)  
Lukáš Klečka, MD (Ostrava, Czech Republic)  
Martin Kovář, MD (Na Homolce Hospital, Czech Republic)  
Jiří Neumann, MD, FESO (Department of Neurology, Krajská zdravotní, a.s. - Hospital Chomutov, Chomutov, Czech Republic)  
Hana Paloušková, MD (Karvina Mining Hospital, Czech Republic)

Martin Reiser, MD (Neurology, České Budejovice Hospital, České Budějovice)  
Petra Reková, MD (Department of Neurology and Centre of Clinical Neuroscience, First Faculty of Medicine, Charles University and General University Hospital in Prague, Prague, Czech Republic)  
Petra Sedova, MD (Department of Neurology. International Clinical Research Centre. St Anne's University Hospital and Faculty of Medicine, Masaryk University, Brno, Czech Republic)  
Miroslav Škorňa, MD (Department of Neurology, Masaryk University Faculty of Medicine, University Hospital Brno, Brno, Czech Republic)  
Martin Šrámek, MD (Central Military Hospital in Prague, Czech Republic)  
Eva Vítková, MD (Department of Neurology, Comprehensive Stroke Center, Charles University Faculty of Medicine and University Hospital, Czech Republic)  
Lenka Žáková, MD (Nemocnice Třinec, Czech Republic)

### **Egypt**

Khalid Sobh, MD (El hussein Alzahar University Hospital, Egypt)

### **Finland**

Kemal Alpay, MD (Department of Radiology, Turku University Hospital, Turku, Finland)  
Riitta Rautio, MD, PhD (Department of Radiology, Turku University Hospital, Turku, Finland), Daniel Strbian, MD, PhD, MSc (Stroke Med) (Department of Neurology, Helsinki University Hospital and University of Helsinki, Helsinki, Finland)

### **France**

Jean-Christophe Gentric, MD (Brest University Hospital, Brest, France), Elsa Magro, MD (Brest University Hospital, Brest, France), Olivier Naggara MD PhD (Université de Paris - GHU Paris - INSERM 1266 CPN), Peggy Reiner, MD (Lariboisiere, France)

### **Germany**

Ferdinand O. Bohmann, MD (Department of Neurology, University Hospital/ Goethe University, Frankfurt, Germany), Stefan Boskamp, MD (Department of Neurology, Albertinen Krankenhaus, Hamburg, Germany), Nima Etminan, MD (Department of Neurosurgery, Mannheim University Hospital, Mannheim, Germany), Roxane-Isabelle Kestner, MD (Department of Neurology, Goethe University Frankfurt, Frankfurt, Germany), Markus A. Möhlenbruch, MD (Heidelberg University Hospital, Heidelberg, Germany) Joshua Mbroh, MD, MSc (Department of Neurology & Stroke, Eberhard-Karls University, Tuebingen, Germany), Simon Nagel, MD (Heidelberg University Hospital, Heidelberg, Germany), Michael Rosenkranz, MD (Department of Neurology, Albertinen Krankenhaus, Hamburg, Germany), Sven Poli, MD, MSc (Department of Neurology & Stroke, Eberhard-Karls University, Tuebingen, Germany), Götz Thomalla, MD (Universitätsklinikum Hamburg-Eppendorf, Klinik und Poliklinik für Neurologie, Hamburg, Germany)

### **Greece**

Theodoros Karapanayiotides, MD (2nd Department of Neurology, AHEPA University Hospital, Aristotle University of Thessaloniki, School of Medicine, Faculty of Health

Sciences, Greece), Odysseas Kargiotis, MD (Stroke Unit, Metropolitan Hospital, Piraeus, Greece), Ioanna Koutroulou, MD (2nd Department of Neurology, AHEPA University Hospital, Aristotle University of Thessaloniki, School of Medicine, Faculty of Health Sciences, Greece), Lina Palaiodimou, MD ("Attikon" University Hospital, National and Kapodistrian University of Athens, Athens, Greece), Georgios Tsivgoulis, MD, PhD MSc ("Attikon" University Hospital, National and Kapodistrian University of Athens, Athens, Greece)

### **Guatemala**

José Domingo Barrientos Guerra, MD (Hospital General San Juan de Dios, Guatemala)

### **India**

Vikram Huded, MD (Mazumdar Shaw Medical Center, Bangalore, Karnataka, India), Shashank Nagendra, MD (Department of Neurology, Grant Medical College and Sir JJ Hospital, Mumbai, India), Chintan Prajapati, MD (Mazumdar Shaw Medical Center, Bangalore, Karnataka, India)

### **Indonesia**

Angga Krishna, MD (Department of Neurology, Faculty of Medicine Udayana University, Sanglah General Hospital Denpasar, Bali, Indonesia), Achmad Firdaus Sani, MD (Dr. Soetomo General Hospital Surabaya, Universitas Airlangga, Indonesia)

### **Iran**

Abdoreza Ghoreishi, MD (Stroke Research Group, Head of Stroke Care Unit, Department of Neurology, Vali-e-Asr Hospital, School of Medicine, Zanjan University of Medical Sciences, Iran), Reza Bahrami Ilkhchi, MD (Department of Neurosurgery, Shohada Hospital, Tabriz University of Medical Sciences, Tabriz, Iran) Javad Jalili, MD (Department of Radiology, Imam Reza Hospital, Faculty of Medicine, Tabriz University of Medical Sciences, Tabriz, Iran)

### **Israel**

Sergiu Ionut Sabetay, MD (Neurology Department, Hillel Yaffe Medical Center, Hadera, Israel), Tariq Abu Raya, MD (Neurology Department, Hillel Yaffe Medical Center, Hadera, Israel),

### **Italy**

Maurizio Acampa, MD, PhD (Stroke Unit, University of Siena, Siena, Italy), Marco Longoni, MD ("Maurizio Bufalini" Hospital, Cesena, Italy), Leonardo Renieri, MD (Interventional neurovascular unit, Careggi University Hospital, Florence), Claudia Rolla Bigliani, MD (IRCCS San Martino Genova, Italy), (Dipartimento di Neuroradiologia Diagnostica e Interventistica Policinico Universitario IRCCS San Martino, Genova Italy)

Lucio Castellan, MD (Policlinico Universitario IRCCS San Martino Genova, Italy) (Dipartimento di Neuroradiologia Diagnostica e Interventistica Policlinico Universitario IRCCS San Martino, Genova Italy)  
Raffaele Ornello, MD, PhD (Neuroscience Section, Department of Biotechnological and Applied Clinical Sciences, University of L'Aquila, Italy),  
Michele Romoli, MD (Neurology and Stroke Unit, Department of Neuroscience, Bufalini Hospital, Cesena, Italy),  
Simona Sacco, MD (Neuroscience Section, Department of Biotechnological and Applied Clinical Sciences, University of L'Aquila, Italy)  
Davide Sangalli, MD (Neurological Department, "Alessandro Manzoni" Hospital, ASST Lecco, Via dell'Eremo 9/11, 23900, Lecco, Italy),  
Martina Viganò, MD (Neurological Department, "Alessandro Manzoni" Hospital, ASST Lecco, Via dell'Eremo 9/11, 23900, Lecco, Italy; University of Milano-Bicocca, Milan, Italy), Andrea Zini, MD (IRCCS Istituto delle Scienze Neurologiche di Bologna, Neurology and Metropolitan Stroke Center, Maggiore Hospital, Bologna, Italy)

### **Japan**

Hiroshi Tokimura, MD (Department of Neurosurgery and Stroke Center, Kagoshima City Hospital, Kagoshima, Japan),  
Kazutaka Sonoda, MD (Department of Neurology, Saiseikai Fukuoka General Hospital, SFGH, Japan),  
Kenichi Todo, MD (Stroke Center, Osaka University Hospital, Japan),  
Hiroki Fukuda, MD (Department of Neurology, Japanese Red Cross Matsue Hospital, Japan)  
Kyohei Fujita, MD, (Department of Endovascular Surgery, Tokyo Medical and Dental University, Tokyo, Japan),  
Manabu Sakaguchi MD (Department of Neurology, Osaka General Medical Center, Japan),  
Masaaki Uno, MD (Department of Neurosurgery, Kawasaki Medical School, Japan),  
Issei Kan, MD (Department of Neurosurgery, The Jikei University School of Medicine)  
Miyake Kosuke, MD (Shiroyama Hospital, Japan),  
Ryuhei Kono, MD (Department of Neurology, Kin-ikyo Chuo Hospital, Japan),  
Naoto Kimura, MD (Department of Neurosurgery, Iwate Prefectural Central Hospital, Japan),  
Nobuaki Yamamoto, MD, (Advanced Brain Research, Tokushima University, Japan),  
Ryoo Yamamoto, MD (Yokohama Brain and Spine Center, Japan),  
Ryosuke Doijiri, MD (Department of Neurology, Iwate Prefectural Central Hospital, Japan),  
Seigo Shindo, MD (Department of Neurology, Japanese Red Cross Kumamoto Hospital, Japan),  
Nobuyuki Ohara, MD (Department of Neurology, Kobe City Medical Center General Hospital),  
Hirotohi Imamura, MD (Department of Neurosurgery, Kobe City Medical Center General Hospital)  
Takehiro Ogawa, MD (Department of Neurosurgery, Japanese Red Cross Kyoto Daini Hospital, Japan),  
Takeshi Uwatoko, MD (Cerebrovascular Medicine, Stroke Center, Saga Medical Centre Koseikan, Japan),

Takuya Kanamaru, MD (NTT Medical Center Tokyo, Tokyo, Japan),  
Toshiyuki Fujinaka, MD, PhD (Department of Neurosurgery, National Hospital Organization Osaka National Hospital, Japan),  
Yohei Takenobu, MD (Osaka Red Cross Hospital, Japan),  
Kazunori Toyoda, MD (Department of Cerebrovascular Medicine, National Cerebral and Cardiovascular Center, Japan)  
Yuji Matsumaru, MD (Department of Stroke and Cerebrovascular Diseases, University of Tsukuba Hospital, Japan),  
Yukako Yazawa, MD (Department of Stroke Neurology, Kohnan Hospital, Sendai, Japan),  
Yuri Sugiura, MD (Toyonaka Municipal Hospital, Japan)

### **Korea, South**

Jang-Hyun Baek, MD (Department of Neurology, Kangbuk Samsung Hospital, Sungkyunkwan University School of Medicine, Seoul, Korea, South (Republic of Korea),  
Young Sub Kwon, MD (Department of Neurosurgery, National Health Insurance Service Ilsan Hospital, Goyang, Korea),  
Yun Ho Lee, MD (Department of Neurosurgery, National Health Insurance Service Ilsan Hospital, Goyang, Korea),  
Kwon-Duk Seo, MD (Department of Neurology, National Health Insurance Service Ilsan Hospital, Goyang, Korea),  
Sung-Il Sohn, MD (Department of Neurology, Keimyung University Dongsan Hospital, Keimyung University School of Medicine, Daegu, South Korea)

### **Malaysia**

Yong Chieh Chan, MD (Hospital Sultan Abdul Halim, Malaysia), Wan Asyraf Wan Zaidi, Mmed (National University of Malaysia, Malaysia)

### **Mexico**

Javier Barrientos-Prieto, MD (Neurology Department, University Hospital Jose Eleuterio Gonzalez, Universidad Autonoma de Nuevo Leon),  
Fernando Gongora-Rivera, MD, PhD (Neurovascular Unit and Neurology Department, University Hospital Jose Eleuterio Gonzalez, Universidad Autonoma de Nuevo Leon and Zambrano Hellion Medical Center, Tec Salud, Mexico),  
Manuel Martinez-Marino, MD, MSc (Department of Neurology, Hospital de especialidades del Centro Médico Nacional Siglo XXI IMSS, Mexico)  
Alejandra Calderón-Vallejo, MD, MSc (Department of Neurology, Hospital de especialidades del Centro Médico Nacional Siglo XXI IMSS, Mexico)

### **Moldova**

Stanislav Groppa, MD, PhD (“Nicolae Testemitanu” State University of Medicine and Pharmacy; Emergency Medicine Institute, Chisinau, Republic of Moldova), Leahu Pavel, MD, PhD student (“Nicolae Testemitanu” State University of Medicine and Pharmacy; Emergency Medicine Institute, Chisinau, Republic of Moldova)

**Netherlands**

Jonathan M Coutinho, MD PhD (Amsterdam University Medical Centers Amsterdam, the Netherlands), Diederik Dippel, MD PhD (Erasmus MC, University Medical Center Rotterdam, Department of Neurology, Netherlands), Leon Rinkel, MD, (Amsterdam University Medical Centers Amsterdam, Netherlands), Dianne H.K. van Dam-Nolen, MD (Erasmus MC, University Medical Center Rotterdam, (1) Department of Neurology, (2) Department of Radiology and Nuclear Medicine, Rotterdam, Netherlands)

**Nigeria**

Ernest Okwundu Nwazor, MBBS, FMCP (Department of Medicine, Federal Medical Centre Owerri, Neurology Unit, Federal Medical Centre, Owerri, Nigeria Imo, Nigeria), Taofiki Ajao Sunmonu, MD (Federal Medical Centre, Owo, Ondo, Nigeria)

**Norway**

Espen Saxhaug Kristoffersen, MD, PhD (Department of Neurology, Akershus University Hospital, University of Oslo, Oslo, Norway)

**Oman**

Amal M Al Hashimi, MD (Central Stroke Unit, Neuroscience Directorate, Khoula Hospital, Ministry of Health, Oman)

**Pakistan**

Saima Ahmad, MBBS (Lahore General Hospital, Lahore, Pakistan), Umair Rashid, MBBS (Lahore General Hospital, Lahore, Pakistan)

**Peru**

Liliana Rodriguez-Kadota, MD (Departamento de Neurología, Hospital Nacional Edgardo Rebagliati Martins, Essalud, Lima, Perú), Miguel ÁNGEL VENCES, MD (Departamento de Neurología, Hospital Nacional Edgardo Rebagliati Martins, Essalud, Lima, Perú)

**Philippines**

Patrick Matic Yalung, MD (St. Luke's Medical Center, Global City, Philippines), Jon Stewart Hao Dy, MD (St. Luke's Medical Center, Quezon City, Philippines)

**Poland**

Waldemar Brola, MD, PhD (Department of Neurology, Specialist Hospital Konskie, Collegium Medicum, Jan Kochanowski University, Kielce, Poland), Aleksander Dębiec, MD (Clinic of Neurology, Military Institute of Medicine, Szaserow 128, 04-141 Warsaw, Poland), Malgorzata Dorobek, MD, PhD (Department of Neurology, Central Clinical Hospital of the Ministry of Interior, Warsaw, Poland; Department of Neurology, Central Clinical Hospital of the Ministry of Internal Affairs and Administration, Warsaw, Poland), Michal Adam Karlinski, MD, PhD (2nd Department of Neurology, Institute of Psychiatry and Neurology, Warsaw, Poland),



Beata M Labuz-Roszak, MD, PhD (Department of Neurology, St.Jadwiga Provincial Specialist Hospital, Institute of Medical Sciences, University of Opole, Opole, Poland),  
Anetta Lasek-Bal, MD, PhD (Department of Neurology, Leszek Giec Upper Silesian Medical Centre of the Silesian Medical University in Katowice, School of Health Sciences, Medical University of Silesia in Katowice, Katowice, Poland),  
Halina Sienkiewicz-Jarosz, MD, PhD (1st Department of Neurology, Institute of Psychiatry and Neurology, Warsaw, Poland),  
Jacek Staszewski, MD, PhD (Clinic of Neurology, Military Institute of Medicine, Szasero 128, 04-141 Warsaw, Poland),  
Piotr Sobolewski, MD (Department of Neurology in Sandomierz, Collegium Medicum, Jan Kochanowski University in Kielce, Sandomierz, Poland),  
Marcin Wiącek, MD (Department of Neurology, Institute of Medical Sciences, Medical College of Rzeszow University, 1A Warzywna Street, 35-310 Rzeszow, Poland),  
Justyna Zielinska-Turek, MD (Department of Neurology, Central Clinical Hospital of the Ministry of Interior; Department of Neurology, Central Clinical Hospital of the Ministry of Internal Affairs and Administration, Warsaw, Poland)

### **Portugal**

André Pinho Araújo, MD (Neuroradiology Department - Centro Hospitalar de Vila Nova de Gaia/Espinho, Portugal),  
Luísa Fonseca, MD (Stroke Unit, Medicine Department, Centro Hospitalar Universitário de São João, Portugal) M Luís Silva, MD (Centro Hospitalar Universitário de São João, Portugal) Pedro Castro, MD PhD (Department of Neurology, Centro Hospitalar Universitário de São João, Portugal)  
Mariana Rocha, MD, (Neurology Department, Centro Hospitalar Vila Nova de Gaia/Espinho)

### **Romania**

Cristian Falup-Pecurariu, MD, PhD (Transilvania University, Faculty of Medicine, Brasov, Romania)

### **Singapore**

Narayanaswamy Venketasubramanian, MD (Raffles Neuroscience Centre, Raffles Hospital, Singapore)

### **Slovakia**

Georgi Krastev, MD, PhD, Miroslav Mako, MD (Department of Neurology, Faculty Hospital Trnava, Jessenius Medical Faculty Martin, Comenius University, Bratislava)

### **Spain**

Oscar Ayo-Martin MD, PhD (Complejo Hospitalario Universitario de Albacete, Albacete, Spain), Jordi Blasco, MD PhD (Interventional Neuroradiology, Hospital Clínic de Barcelona, Spain), Antonio Cruz-Culebras, MD (Department of Neurology (Unidad de Ictus), Hospital Universitario Ramón y Cajal, Madrid, Spain), Francisco Hernandez-Fernandez, MD PhD (Complejo Hospitalario Universitario de Albacete, Albacete, Spain),

Claudio Rodríguez Fernández, MD (Department of Neuroradiology, Hospital Universitario Rey Juan Carlos, Spain)

Jorge Escartín López, MD (Department of Neuroradiology, Hospital Universitario Rey Juan Carlos),

Alejandro Rodriguez, MD (Comprehensive Stroke Center, Hospital Clínic de Barcelona, Spain)

### **Switzerland**

Manuel Bolognese, MD (Neurozentrum, Luzerner Kantonsspital, Luzerne, Switzerland),

Grzegorz Marek Karwacki, MD (Department of Radiology and Nuclear Medicine, Luzerner Kantonsspital, Lucerne, Switzerland), Emanuela Keller, MD (University

Hospital, University of Zurich, Switzerland), Paolo Machi, MD (Interventional

Neuroradiology, University Hospitals of Geneva, Switzerland), Gianmarco Bernava, MD (Interventional Neuroradiology, University Hospitals of Geneva, Switzerland)

### **Thailand**

Surawan Boonyakarnkul, MD (Ramathibodi hospital, Mahidol university, Thailand),

Anchalee Churojana, MD (Department of Radiology, Siriraj Hospital, Mahidol University, Thailand)

### **Tunisia**

Nadia Hammami, MD (Department of Neuroradiology, Tunis El Manar University, National institute of Neurology Tunis, Tunisia)

### **Turkey**

Arsida Bajrami, MD (Istanbul Aydın University, Florya Medicalpark Stroke Center,

Turkey), Songul Senadim, MD (Istanbul Aydın University, Florya Medicalpark Stroke Center, Turkey)

### **UAE**

Syed I Hussain, MD (Cleveland Clinic Abu Dhabi, UAE), Seby John, MD (Cleveland Clinic Abu Dhabi, UAE)

### **United Kingdom**

Graham Dow, MD (Nottingham University Hospitals NHS Trust), Kailash Krishnan, MD

PhD (Nottingham University Hospitals NHS Trust), Robert Lenthall, MD (Nottingham

University Hospitals NHS Trust), Ken Wong, MD (Royal London Hospital, Barts Health NHS Trust, London, UK), Liqun Zhang, MD, PhD (St George's University Hospital,

London, UK)

### **United States**

Dorothea Altschul, MD (Valley Hospital Health System, Neurosurgeons of NJ, New

Jersey, USA), Kaiz S. Asif, MD (Amita Health and University of Illinois-Chicago,

Chicago, USA), Mohammad A. Aziz-Sultan, MD (Brigham & Women's Hospital, Boston,

USA) Ivo Bach, MD (Rutgers University), Zeelalem Bahiru, NP (Inova Fairfax Hospital,

Virginia, USA), Kristine Below, BS (Neuroscience and Stroke Program, Bon Secours

Mercy Health St Vincent Hospital, Toledo, Ohio), Jose Biller, MD (Loyola University Chicago Stritch School of Medicine, Illinois, USA), Anna M. Cervantes-Arslanian, MD (Boston Medical Center), Saqib A. Chaudhry, MD (Inova Fairfax Hospital, University of Virginia School of Medicine, Virginia, USA), Alex Chebl, MD (Henry Ford Health System, Detroit, Michigan, USA), Michael Chen, MD (Rush University, Illinois, USA), Marco Colasurdo, MD (Department of Radiology, University of Texas Medical Branch, Galveston, Texas, USA) Alexandra Czap, MD (Neurology, McGovern Medical School at the University of Texas Health Science Center, Houston, Texas, USA), Hormuzdiyar Dasenbrock, MD MPH (Boston Medical Center) Adam H. de Havenon, MD (University of Utah, Utah, USA), Sushrut Dharmadhikari MD (Baptist Health Medical Center - Little Rock, Little Rock, Arkansas, USA), Adam A. Dmytriw, MD MPH MSc (Brigham & Women's Hospital, Boston, USA) Clifford J. Eskey, MD, PhD (Dartmouth Hitchcock Medical Center, Lebanon, New Hampshire, USA), Mark Etherton, MD, PhD (Department of Neurology, Massachusetts General Hospital, Boston, Massachusetts, USA), Chizoba Ezepue, MD (Department of Interventional and Vascular Neurology, Neuroscience Center, SSM Health DePaul Hospital, St. Louis, Missouri, USA), Lauren Fink, BSN, RN (Santa Barbara Cottage Hospital) Ulviyya Gasimova, MD (Department of Neurology, Saint Louis University School of Medicine, Missouri, USA), Nitin Goyal, MD (University of Tennessee Health Science Center, Tennessee, USA), Kasey B Grimmett, RN, BSN (Baptist Health Medical Center - Little Rock, Little Rock, Arkansas, USA), Maryam Hakemi, MSN, NP (Wayne State University, Detroit, MI, Detroit, Michigan, USA), Taryn Hester, BSN, RN, (Cooper Neurological Institute, Cooper University Hospital, Camden, NJ, USA) Violiza Inoa, MD (University of Tennessee Health Science Center, Tennessee, USA), Peter T. Kan, MD, MPH (Department of Neurosurgery, University of Texas Medical Branch, USA), Ekkehard M. Kasper, MD (St. Elizabeth's Medical Center, USA), Priyank Khandelwal, MD, (Rutgers University, USA), Rakesh Khatri, MD (Department of Neurology, Texas Tech University Health Science Center, El Paso, Texas), Ayaz M Khawaja, MD (Wayne State University, Detroit, MI, Detroit, Michigan, USA), Naim Khoury, MD (HSHS St. John's Hospital (N.N.K.), Southern Illinois University School of Medicine, Springfield, USA), Benny S. Kim, MD (Virginia Hospital Center, Virginia, USA), Murali Kolikonda, MD (Baptist Health Medical Group, Baptist Health Lexington, Lexington, Kentucky, USA), Anna Luisa Kuhn, MD, PhD (Division of Neurointerventional Radiology, Department of Radiology, University of Massachusetts Medical Center, Worcester, Massachusetts, USA), Guillermo Linares, MD (Vascular and Neurointerventional Services, Saint Louis University, Missouri, USA), Italo Linfante, MD (Miami Cardiac & Vascular Institute, Miami Neuroscience Institute, Miami, FL, USA), Aaron I. Loochtan, DO (Ohio Health Riverside Methodist Hospital, Ohio, USA), Timothy G. Lukovits, MD (Dartmouth Hitchcock Medical Center, Lebanon, New Hampshire, USA), Shailesh S. Male, MD (Department of Neurology & Neurosurgery, Vidant Medical Center, Greenville, North Carolina, USA), Laith Maali, MD (Department of Neurology, University of Kansas Medical Center, USA), Hesham E Masoud, MD (Department of Neurology, SUNY Upstate, Syracuse, New York, USA), Elsi Milagros Galecio-Castillo (University of Iowa, Iowa, USA), Jiangyong Min, MD, PhD (Department of Neurosciences and Comprehensive Stroke Center, Spectrum Health and Michigan State University College of Human Medicine, Michigan, USA), Ghada A. Mohamed, MD (Emory University School of medicine, georgia, USA), Krishna Nalleballe, MD (Department of Neurology,

University of Arkansas for Medical Sciences (UAMS), Arkansas, USA), Santiago Ortega-Gutierrez, MD, MSc, (University of Iowa, Iowa, USA), Ajit S Puri, MD (Division of Neurointerventional Radiology, Department of Radiology, University of Massachusetts Medical Center, U Mass, Worcester, Massachusetts, USA), Yazan Radaideh, MD (Rush University, Illinois, USA), Rahul H. Rahangdale, MD (Ascension St Johns Medical Center, Tulsa, Oklahoma, USA), Pankajavalli Ramakrishnan, MD PhD (Riverside Regional Medical Center, Newport News Virginia), Aravind B. Reddy, MD (SUNY Upstate, Syracuse, New York, USA), Sean Ruland, DO (Loyola University Chicago Stritch School of Medicine, Illinois, USA), Setareh Salehi Omran, MD (University of Colorado School of Medicine, Aurora, CO), Sunil A. Sheth, MD (Neurology, UTHHealth McGovern Medical School, Houston, TX, USA, Houston, Texas, USA) James E. Siegler, MD (Cooper Neurological Institute, Cooper University Hospital, Camden, NJ, USA), Amy K. Starosciak, PhD (Miami Neuroscience Institute, Miami, USA), Nicholas E Tarlov, MD (Community Memorial Hospital, Ventura, California, USA), Robert A. Taylor, MD (Santa Barbara Cottage Hospital), Jenny Tsai, MD (Neurological Surgery, Department of Neurosciences and Comprehensive Stroke Center, Spectrum Health and Michigan State University College of Human Medicine, Michigan, USA), Michael J. Wang, MD (UNC School of Medicine, North Carolina, USA), Ka-Ho Wong, BS, MBA (University of Utah, USA) Osama O. Zaidat, MD, MS (Neuroscience and Stroke Program, Bon Secours Mercy Health St Vincent Hospital, Toledo, Ohio)

### **Vietnam**

Huynh Vu Le, MD (Hue Central, Hue, Vietnam), Thong Nhu Pham, MD (Da Nang Hospital, Da Nang, Vietnam), Hoang Thi Phan, MD (Bach Mai Hospital, Hanoi, Vietnam and University of Tasmania, Tasmania, Australia) Mai Duy Ton, MD (Bach Mai Hospital, Hanoi, Vietnam) Anh Duc Tran, MD (Hue Central, Hue, Vietnam)

**Last tier:** Markus A. Möhlenbruch, MD (Heidelberg University Hospital, Heidelberg, Germany) Simon Nagel, MD, (Heidelberg University Hospital, Heidelberg, Germany; Ludwigshafen City Hospital, Ludwigshafen, Germany) Jean Raymond, MD (Centre Hospitalier de l'Université de Montreal, Canada), Raul G. Nogueira, MD (University of Pittsburgh Medical Center, Pittsburgh, USA)

### **Collaborators**

Philippe Bijlenga, Geneva University Hospitals, Geneva  
María Jesús García Sánchez (Hospital Universitario rey Juan carlos)  
Marta Guillán Rodríguez (Hospital Universitario rey Juan carlos)  
Jose Carlos Fernández Ferro (Hospital Universitario rey Juan carlos)  
Niloofer Mohammadzadeh as data entry staff in Neurosciences Research Center, Tabriz University of Medical Sciences, Tabriz, Iran  
Neil C. Suryadevara, MD (SUNY Upstate, New York, USA),

### **DISCLOSURES**

These coauthors have the following funding:

Supported by STROCZECH within CZECRIN Large Research Infrastructure (No. LM2018128) funded by the state budget of the Czech Republic.

FNUSA – MUDr. Petra Šedová, Ph.D., prof. MUDr. Robert Mikulík, Ph.D.

Nemocnice České Budějovice - MUDr. Jan Rosol

FN Hradec Králové - prof. MUDr. Roman Herzig, PhD., FESO, FEAN

Nemocnice Jihlava - MUDr. Ondřej Škoda

Karvinská hornická nemocnice, a.s. - MUDr. Hana Paloušková

Nemocnice Liberec - MUDr. Lubomír Jurák

Nemocnice Na Homolce - MUDr. Martin Kovář

Ústřední vojenská nemocnice Praha - MUDr. Martin Šrámek

Dr. Falup-Pecurariu reported royalties from Springer Nature Publishing Group and Elsevier, Research Grant from Transilvania University Brasov, Speaker fees and honoraria from International Parkinson and Movement Disorders Society, AbbVie, outside the submitted work.

Dr Mikulik was supported by project No. CA18118, IRENE COST Action funded by COST Association, by the IRIS-TEPUS Project No. LTC20051 from the INTER-EXCELLENCE INTER-COST Program of the Ministry of Education, Youth and Sports of the Czech Republic, and by STROCZECH within CZECRIN Large Research Infrastructure No. LM2018128 funded by the state budget of the Czech Republic.

Dr. Nguyen reports research support from Medtronic and the Society of Vascular and Interventional Neurology (SVIN)

Dr Nogueira reported consulting fees for advisory roles with Anaconda, Biogen, Cerenovus, Genentech, Hybernia, Imperative Care, Medtronic, Phenox, Philips, Prolong Pharmaceuticals, Stryker Neurovascular, Shanghai Wallaby, and Synchron and stock options for advisory roles with Astrocyte, Brainomix, Cerebrotech, Ceretrieve, Corindus Vascular Robotics, Vesalio, Viz-AI, RapidPulse, and Perfuze; and investments in Viz-AI, Perfuze, Cerebrotech, Reist/Q'Apel Medical, Truvic, and Viseon.

Dr. Ajit Puri is a consultant for Cerenovus, CereVasc, Merit and Medtronic; research grant from Medtronic. Stocks in InNeuroCo, Galaxy, Agile, Perfuze, and NTI.

Dr. Sienkiewicz-Jarosz reported research grants from National Center for Research and Development, Medical Research Agency, lecturer's fees from Medycyna Praktyczna, and membership of the advisory board for Biogen.

Dr. Yamagami reported research grants from Bristol-Myers Squibb, lecturer's fees from Bayer, Daiichi-Sankyo, Stryker, and membership of the advisory boards for Daiichi-Sankyo outside the submitted work.

Dr. Siegler reports speakers bureau from AstraZeneca, consulting fees from Ceribell.

Dr. Min reported consulting fees for advisory roles with Abbott and Medtronic

Dr Rautio is a consultant for Medtronic, Stryker, Acandis and Microvention.

Dr. Škorňa reported speaker fees from Pfizer and Medtronic.

Dr. Zini declares speaker and consulting fees from Boehringer-Ingelheim, Cerenovus and advisory board from Boehringer-Ingelheim and Stryker and declares grant from the Italian Ministry of Health as principal investigator for clinical trial (RF-2019-12370834).

| <b>Table S1. Nontraumatic SAH admissions overall and monthly volumes before and during the COVID-19 pandemic.</b> |                |       |       |                      |                   |                 |                    |                 |              |
|-------------------------------------------------------------------------------------------------------------------|----------------|-------|-------|----------------------|-------------------|-----------------|--------------------|-----------------|--------------|
|                                                                                                                   | Overall volume |       |       |                      |                   | Monthly volume* |                    |                 |              |
|                                                                                                                   | N              | n1    | n2    | Change               | P                 | N               | Before COVID-19    | During COVID-19 | P            |
|                                                                                                                   |                |       |       | % (95% CI)           |                   |                 | Adjusted Mean (SE) |                 |              |
| <b>Overall</b>                                                                                                    | 162            | 8,578 | 8,223 | -4.1 (-4.6 - -3.7)   | <b>0.006</b>      | 169             | 5.30 (0.89)        | 5.01 (0.89)     | <b>0.003</b> |
| <b>Hospital Nontraumatic SAH volume<sup>†</sup></b>                                                               |                |       |       |                      |                   |                 |                    |                 |              |
| <b>Low</b>                                                                                                        | 53             | 505   | 551   | 9.1 (6.9 - 11.9)     | 0.157             | 55              | 0.71 (0.09)        | 0.76 (0.10)     | 0.345        |
| <b>Intermediate</b>                                                                                               | 54             | 2,012 | 1,959 | -2.6 (-3.4 - -2.0)   | 0.40              | 57              | 2.97 (0.20)        | 2.86 (0.22)     | 0.394        |
| <b>High</b>                                                                                                       | 55             | 6,241 | 5,713 | -8.5 (-9.2 - -7.8)   | <b>&lt;0.0001</b> | 57              | 10.17 (1.65)       | 9.34 (1.66)     | <b>0.002</b> |
| <b>Hospital nontraumatic SAH volume stratified by Hospital COVID-19 volume<sup>‡</sup></b>                        |                |       |       |                      |                   |                 |                    |                 |              |
| <b>Low</b>                                                                                                        | 50             | 2,199 | 2,208 | 0.41 (0.22 - 0.78)   | 0.892             | 51              | 4.37 (1.07)        | 4.38 (1.07)     | 0.956        |
| <b>Intermediate</b>                                                                                               | 47             | 1,989 | 1,884 | -5.3 (-6.4 - -4.4)   | 0.092             | 49              | 2.79 (0.83)        | 2.59 (0.81)     | 0.114        |
| <b>High</b>                                                                                                       | 44             | 3,430 | 3,063 | -10.7 (-11.8 - -9.7) | <b>&lt;0.0001</b> | 46              | 6.0 (1.62)         | 5.29 (1.59)     | 0.011        |

**Abbreviations:** SAH=Subarachnoid Hemorrhage; N=number of hospitals; n1=number of admissions during twelve months before COVID-19 pandemic; n2= number of admissions during twelve months of COVID-19 pandemic; CI=confidence interval; SE=standard error

\*The monthly volume analysis is adjusted for the date of peak COVID-19 volume for each country, the start date of the second wave, and the continent.

<sup>†</sup>P: Low vs Intermediate=N/A; Low vs High=N/A; Intermediate vs High=<0.0001

<sup>‡</sup>P: Low vs Intermediate=N/A; Low vs High=N/A; Intermediate vs High=<0.0001
